# Supplementary material
Source: HighWire-hosted journal article supplement (https://bmjopen.bmj.com/content/8/7/e020031)
Supplement: inline-supplementary-material-2 [file inline-supplementary-material-2.pdf]

**Supplementary Table 1** - Prevalence and risk of stillbirth associated with the 16 possible combinations of change in strength and frequency of movement in the last 2 weeks

| Strength | Frequency | Stillbirths<br>N=290<br>(missing=1) | Controls<br>N=724<br>(missing=9) | Univariable OR<br>(95%CI) |
|----------|-----------|-------------------------------------|----------------------------------|---------------------------|
| Increase | Increase  | 29 (10.0%)                          | 232 (32.0%)                      | 0.18 (0.11, 0.28)         |
| Increase | Decrease  | 7 (2.4%)                            | 27 (3.7%)                        | 0.37 (0.16, 0.88)         |
| Increase | Same      | 16 (5.5%)                           | 190 (26.2%)                      | 0.12 (0.07, 0.21)         |
| Increase | Unknown   | 1 (0.3%)                            | 6 (0.8%)                         | 0.24 (0.03, 2.01)         |
|          |           |                                     |                                  |                           |
| Decrease | Increase  | 1 (0.3%)                            | 2 (0.3%)                         | 0.72 (0.06, 7.97)         |
| Same     | Increase  | 5 (1.7%)                            | 13 (1.8%)                        | 0.55 (0.19, 1.58)         |
| Unknown  | Increase  | 2 (0.7%)                            | 6 (0.8%)                         | 0.48 (0.10, 2.40)         |
|          |           |                                     |                                  |                           |
| Decrease | Decrease  | 51 (17.5%)                          | 23 (3.2%)                        | 3.17 (1.84, 5.46)         |
| Same     | Decrease  | 22 (7.6%)                           | 10 (1.4%)                        | 3.15 (1.44, 6.88)         |
| Unknown  | Decrease  | 5 (1.7%)                            | 3 (0.4%)                         | 2.38 (0.56, 10.16)        |
|          |           |                                     |                                  |                           |
| Decrease | Unknown   | 2 (0.7%)                            | 2 (0.3%)                         | 1.43 (0.20, 10.29)        |
| Same     | Unknown   | 5 (1.7%)                            | 2 (0.3%)                         | 3.57 (0.68, 18.73)        |
| Unknown  | Same      | 8 (2.7%)                            | 6 (0.8%)                         | 1.91 (0.65, 5.63)         |
| Unknown  | Unknown   | 7 (2.4%)                            | 7 (1.0%)                         | 1.43 (0.49, 4.18)         |
|          |           |                                     |                                  |                           |
| Decrease | Same      | 8 (2.7%)                            | 23 (3.2%)                        | 0.50 (0.22, 1.15)         |
| Same     | Same      | 121 (41.6%)                         | 172 (23.5%)                      | Reference                 |
